# Supplementary material for: Waterless tanning: chrome tanning in ethanol and its derivatives
Source: Royal Society of Chemistry journal article supplement (doi:10.1039/c5ra11740b), 2015-01-01

## Electronic Supplementary Information

### **Waterless tanning: Chrome tanning in ethanol and its derivatives**

**S. Silambarasan, R. Aravindhana, J. Raghava Rao\* and P. Thanikaivelan\***

*Central Leather Research Institute (Council of Scientific and Industrial Research), Adyar,  
Chennai 600020, India.*

**Fig. S1.** Scanning electron microscopic images showing the surface of control and experimental crust leathers from (a) pickle-based (b) pickle-less chrome tanning in ethanol medium and (c) pickled-based chrome tanning in water medium. Post tanning was carried out in water medium for both control and experimental chrome tanned leathers.

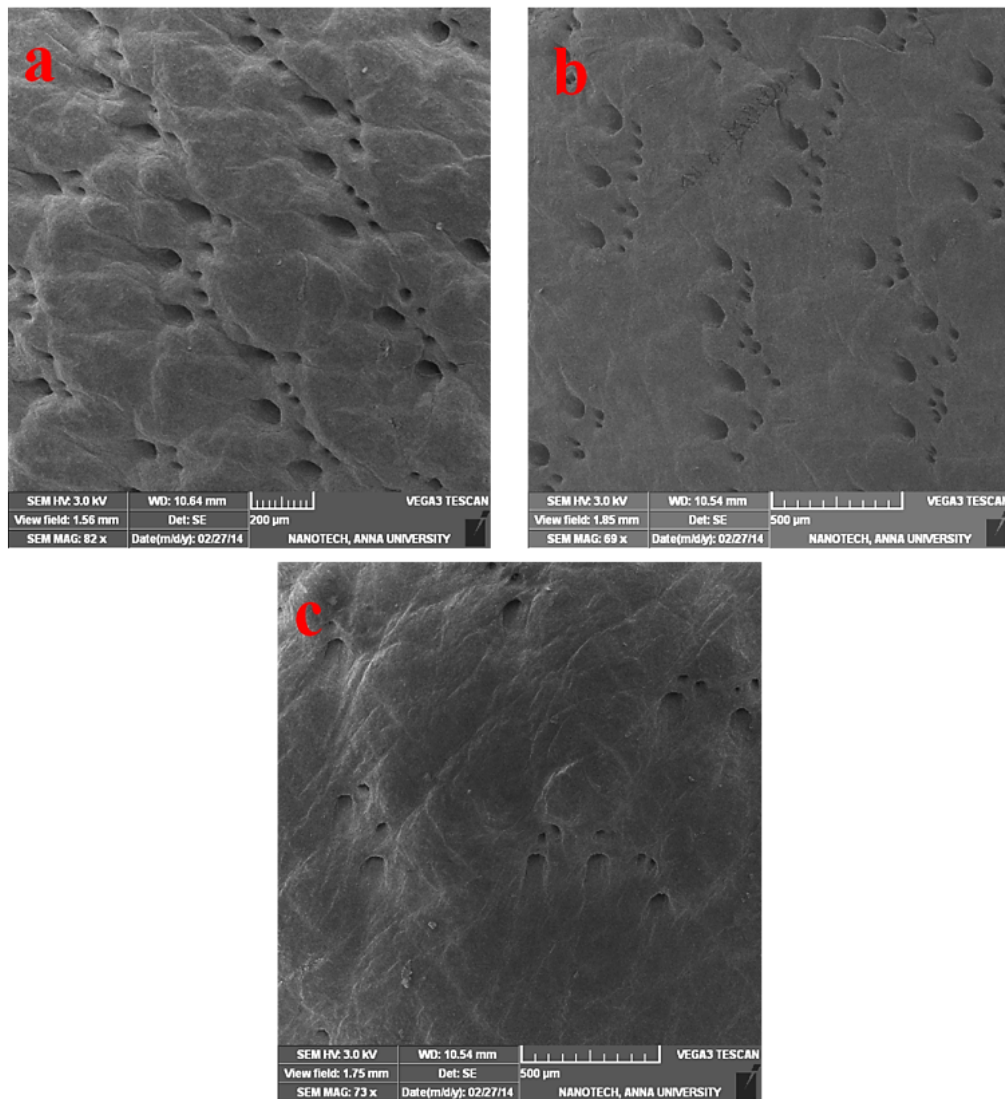

**Fig. S2.** Scanning electron microscopic images showing the cross section of control and experimental chrome tanned leathers from (a) pickle-based (b) pickle-less chrome tanning in ethanol medium and (c) pickled-based chrome tanning in water medium. Post tanning was carried out in water medium for both control and experimental chrome tanned leathers.

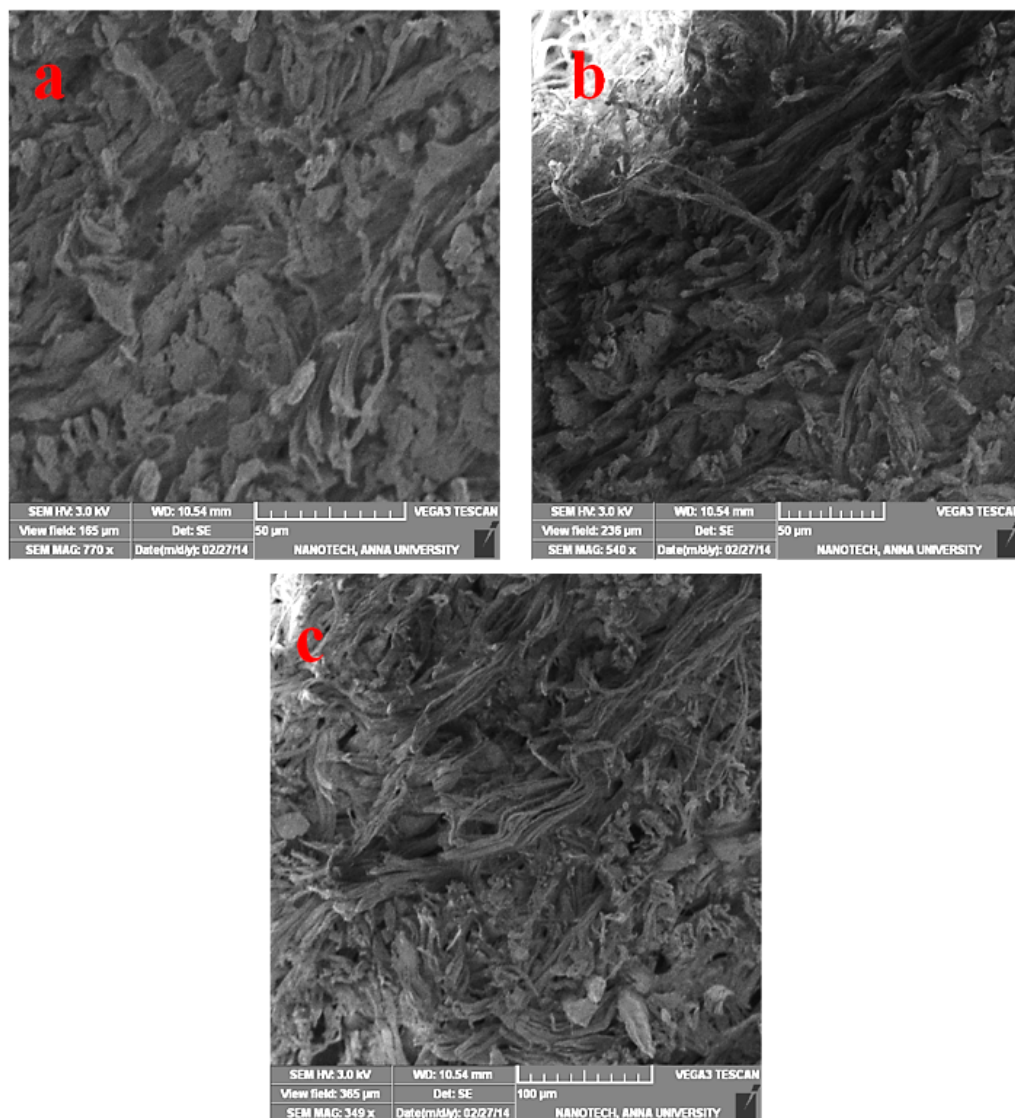

Supplement: c5ra11740b1.pdf [file c5ra11740b1.pdf]
